# Supplementary material
Source: PubMed Central journal article supplement (PMC3604149)

## Clinical & Experimental Metastasis

### Integrin $\alpha 3\beta 1$ regulates tumor cell responses to stromal cells and can function to suppress prostate cancer metastatic colonization

Afshin Varzavand, Justin M. Drake, Robert U. Svensson, Mary E. Herndon, Bo Zhou  
Michael D. Henry and Christopher S. Stipp

Address correspondence to: Christopher Stipp, University of Iowa, Department of Biology, 210 E. Iowa Avenue, BBE 236, Iowa City, IA 52242. Tel: 319-335-0192. Fax: 319-335-1069;  
E-mail: [christopher-stipp@uiowa.edu](mailto:christopher-stipp@uiowa.edu)

**Supplementary Fig. 1** Severely impaired growth of  $\alpha 3$ -silenced cells in 3D Matrigel. 3000 wild type or  $\alpha 3$ -silenced cells per well were embedded in growth factor reduced 3D Matrigel and overlaid with serum-free medium. After 3 weeks, wells were photographed using a 4X objective, and colony formation was assessed by counting the number of colonies per field in 3 random fields from each of two wells per cell type. The wild type cells formed 10-fold more colonies per field than the  $\alpha 3$ -silenced cells ( $p < 0.0001$ , unpaired t test).

**Supplementary Fig. 2** The RNAi silencing vector does not influence  $\alpha 3$  integrin function and has minimal impact on tumor cell growth in vitro or in vivo. **(A)** GS689.Li wild type parental cells (WT), cells harboring a scrambled control shRNA (SCR), and  $\alpha 3$  integrin-silenced cells ( $\alpha 3$ si) were plated in wells coated with LM-332 or BSA for an adhesion assay as in Fig. 1B. The SCR cells adhered to LM-332 just as well as the wild type cells, while the  $\alpha 3$ si cells showed significantly impaired adhesion compared to both WT and SCR cells ( $*p < 0.001$ , ANOVA with Tukey post-test). **(B)** GS689.LI WT, SCR, and  $\alpha 3$ si cells were plated on LM-332-coated coverslips for a cell spreading assay as in Fig. 3. The  $\alpha 3$ si cell spread area was significantly less than the spread areas of the WT or SCR cells ( $p < 0.001$ , ANOVA with Tukey post test). **(C)** GS689.LI WT, SCR, and  $\alpha 3$ si cells were plated on 3D collagen with embedded MRC-5 fibroblasts, as in Fig. 5, and tumor cell growth was monitored by bioluminescence (BLI). The  $\alpha 3$ si cell growth was significantly higher than both WT and SCR cells ( $*p < 0.01$  and  $^{\#}p < 0.05$ , ANOVA with Tukey post test). The growth of SCR cells appeared modestly enhanced compared to WT, but the difference between them was not statistically significant. **(D)** GS689.Li WT and SCR cells were injected by tail vein into SCID mice, and in vivo growth was monitored by BLI as in Figure 2. The growth of the SCR cells was not enhanced compared to WT, and if anything appeared modestly reduced at later time points ( $*p = 0.0779$ , unpaired t test for the final time point).

**WT**

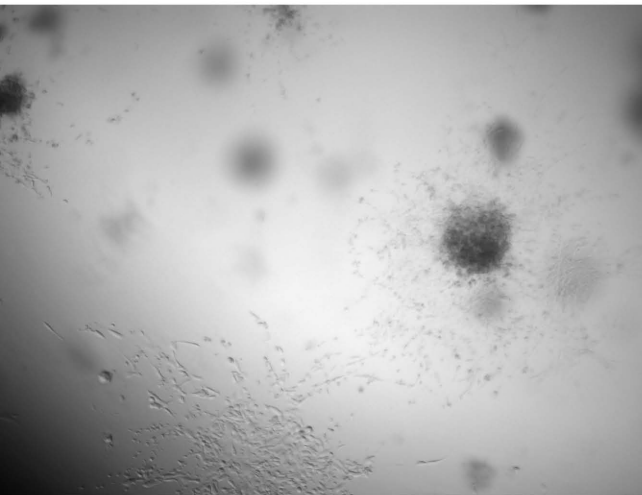

**$\alpha 3$ si**

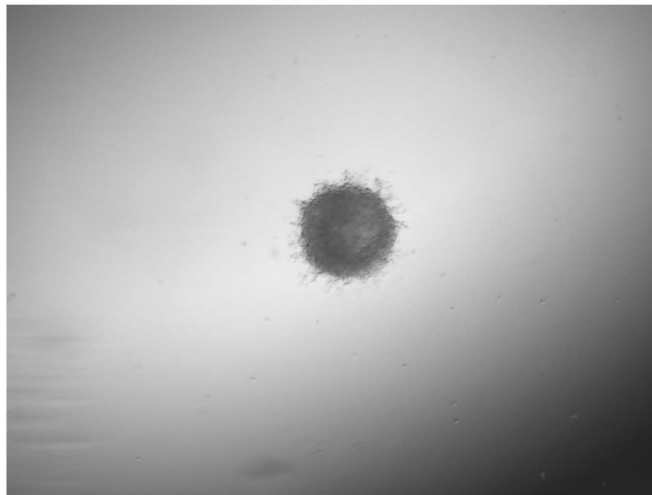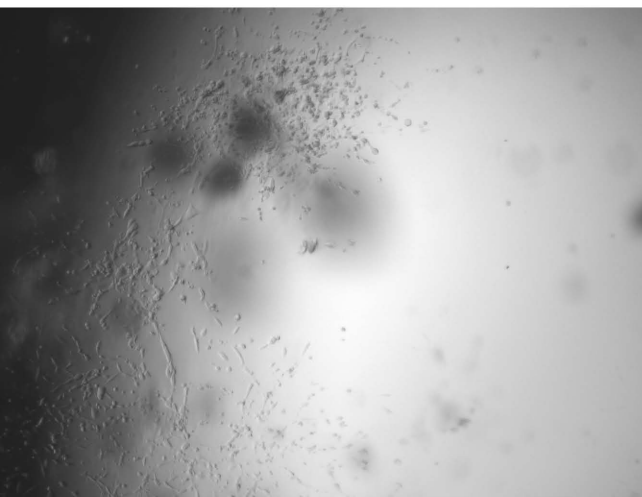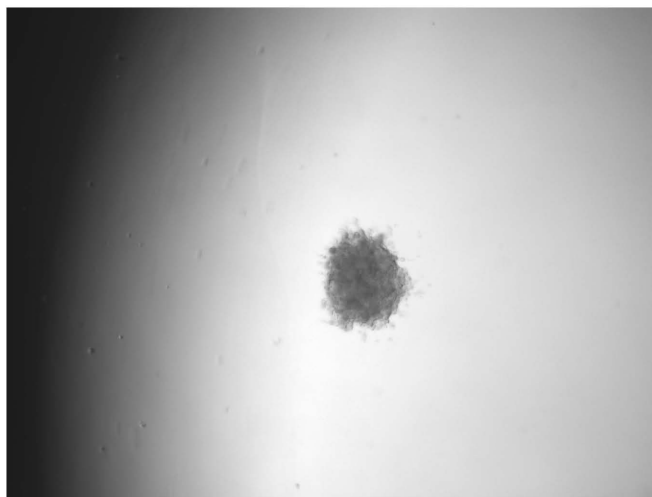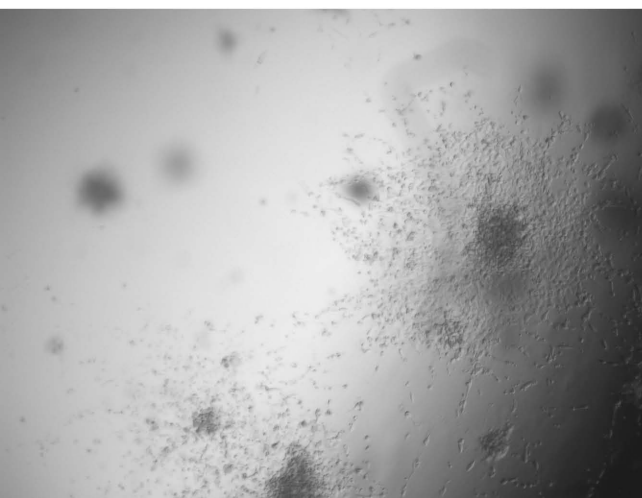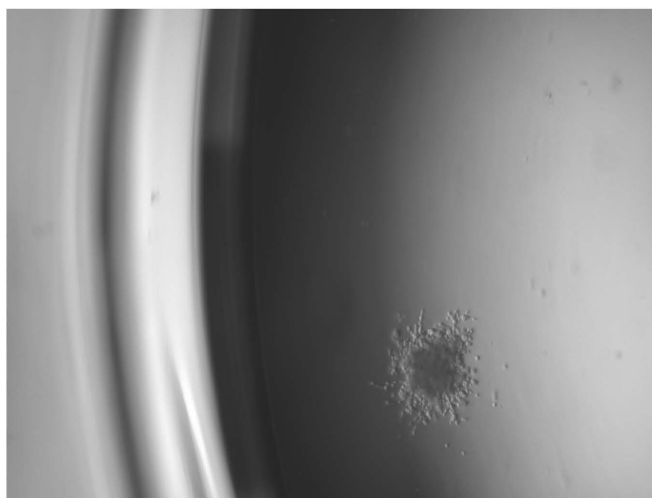

**$11.2 \pm 0.9$  colonies/field**

**$1.2 \pm 0.2$  colonies/field**

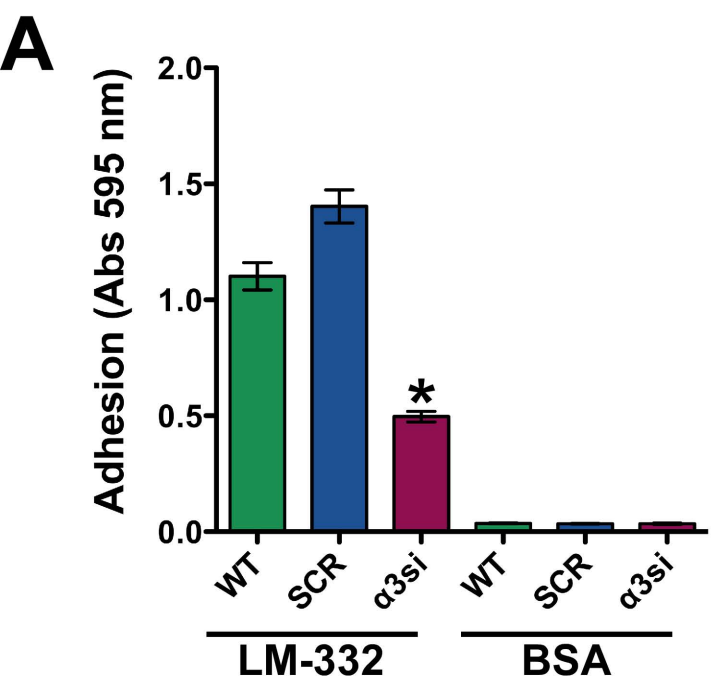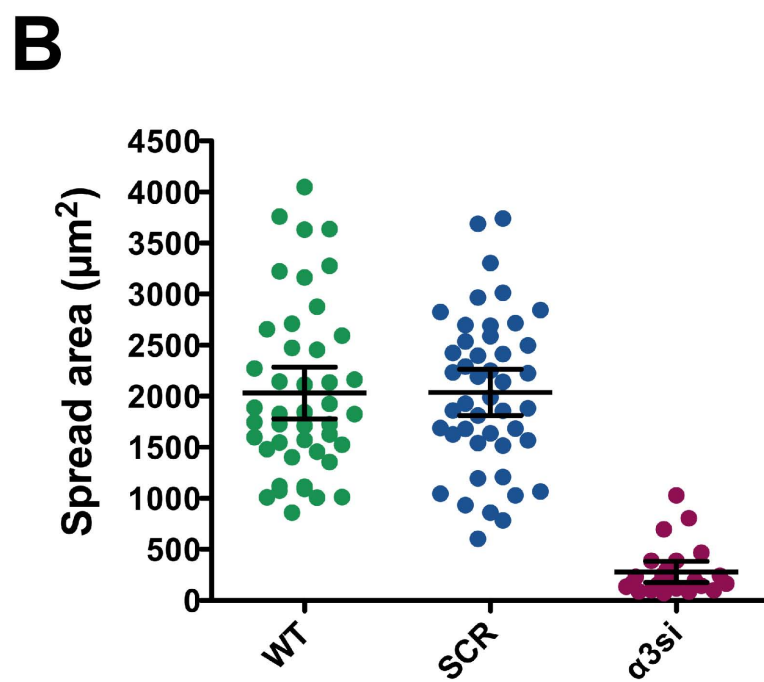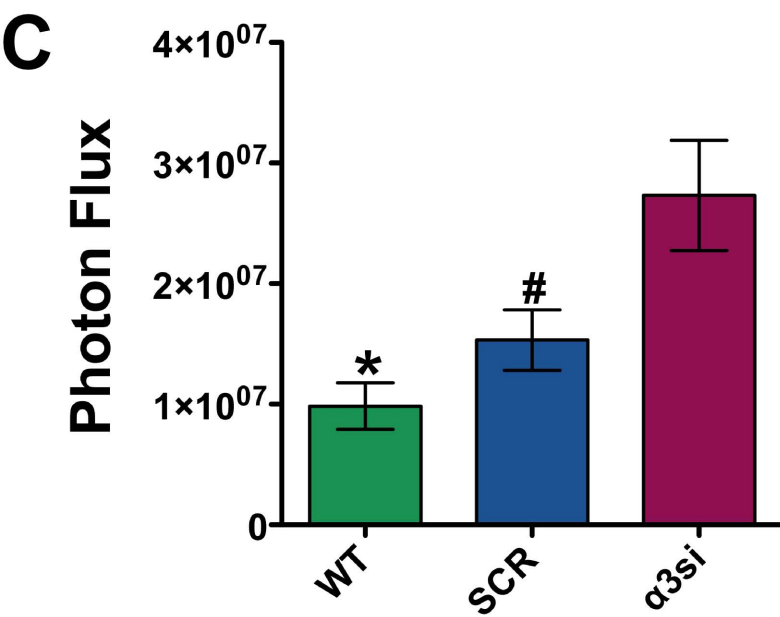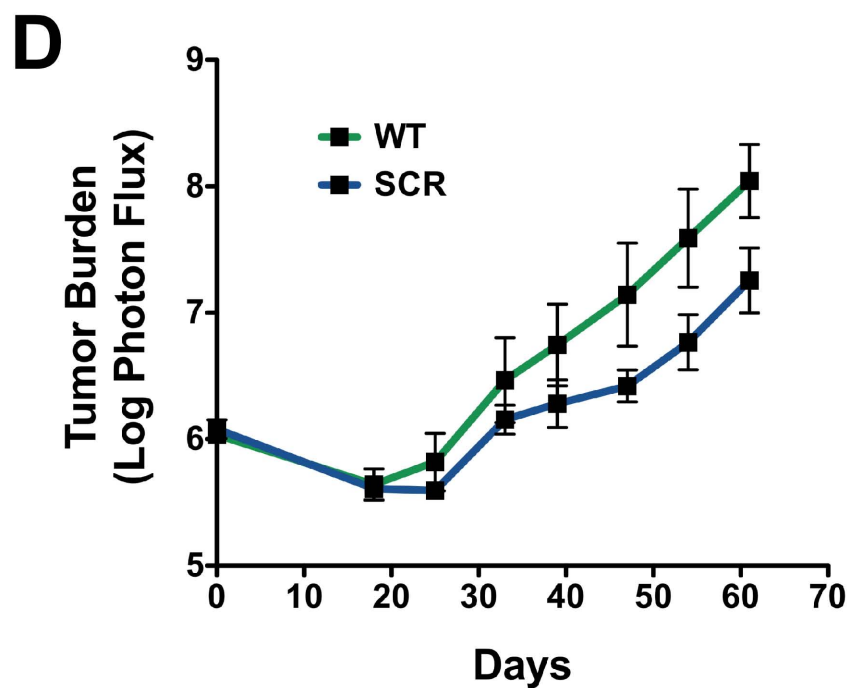

Supplement: NIHMS427159-supplement-10585_2012_9558_MOESM1_ESM.pdf [file NIHMS427159-supplement-10585_2012_9558_MOESM1_ESM.pdf]
